# Supplementary material for: A stable gene set for prediction of prognosis and efficacy of chemotherapy in gastric cancer
Source: PubMed Central journal article supplement (PMC8194165; doi:10.1186/s12885-021-08444-w), 2021-06-10

# SGRS-OS

# SGRS-PFI

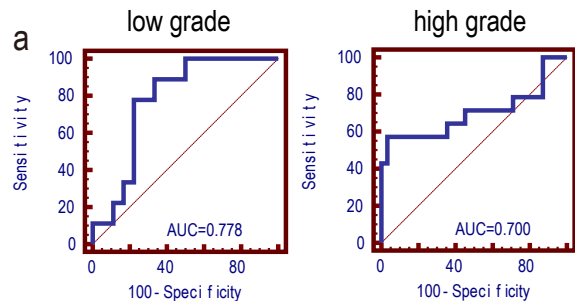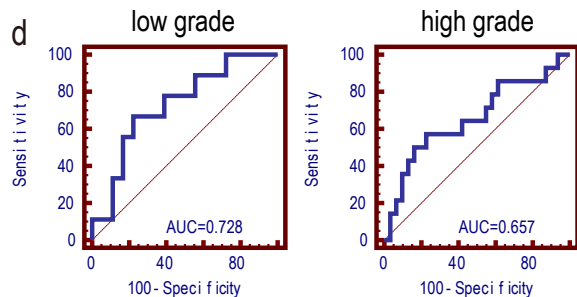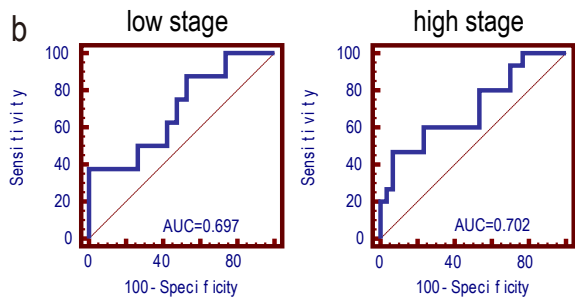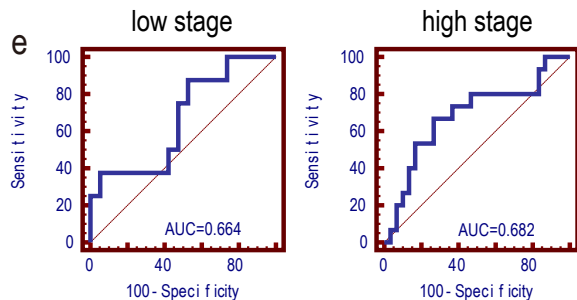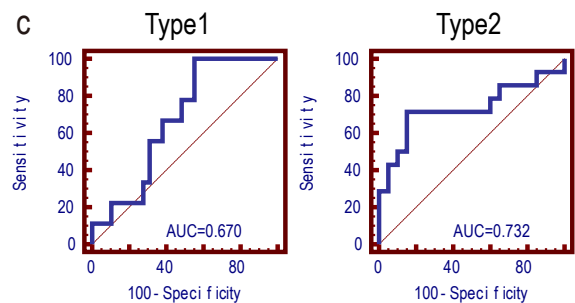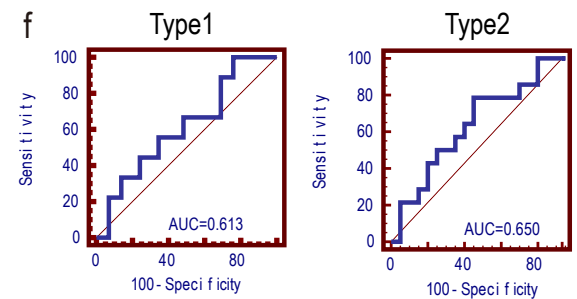

Supplement: 12885_2021_8444_MOESM8_ESM.pdf [file 12885_2021_8444_MOESM8_ESM.pdf]
